# Supplementary material for: Clinical utility of automatic phenotype annotation in unstructured clinical notes: intensive care unit use
Source: HighWire-hosted journal article supplement (doi:10.1136/bmjhci-2021-100519), 2022-11-01
Supplement: bmjhci-2021-100519supp001_data_supplement.pdf [file bmjhci-2021-100519supp001_data_supplement.pdf]

## A Appendix

### A.1 Data distribution by splits

| Task                         | Counts |          |              |           |                   |          |
|------------------------------|--------|----------|--------------|-----------|-------------------|----------|
|                              | Split  | Patients | ICU Episodes | Timesteps | Labels            |          |
|                              |        |          |              |           | Positive          | Negative |
| Physiological Decompensation | CV-1   | 5125     | 6215         | 528425    | 10283             | 518142   |
|                              | CV-2   | 5129     | 6134         | 507892    | 10821             | 497071   |
|                              | CV-3   | 5141     | 6264         | 511289    | 10426             | 500863   |
|                              | CV-4   | 5102     | 6297         | 527853    | 11020             | 516833   |
|                              | Test   | 3683     | 4463         | 367533    | 6931              | 360602   |
| In-Hospital Mortality        | CV-1   | 2929     | 3382         | 162063    | 441               | 2941     |
|                              | CV-2   | 2917     | 3331         | 159566    | 466               | 2865     |
|                              | CV-3   | 2888     | 3356         | 160732    | 439               | 2917     |
|                              | CV-4   | 2936     | 3410         | 163284    | 477               | 2933     |
|                              | Test   | 2119     | 2453         | 117500    | 283               | 2170     |
| Length of Stay               | CV-1   | 5151     | 6245         | 532403    | Refer to Table S2 |          |
|                              | CV-2   | 5145     | 6154         | 510227    |                   |          |
|                              | CV-3   | 5160     | 6286         | 514147    |                   |          |
|                              | CV-4   | 5117     | 6314         | 530331    |                   |          |
|                              | Test   | 3698     | 4483         | 369350    |                   |          |

**Table S1.** Data distribution by splits. For the physiological decompensation and length of stay tasks, timesteps are taken as samples as the predictions are made every hourly timesteps, while for the in-hospital mortality task, ICU episodes are taken as samples as the predictions are made at a fixed timestep. Here, *CV* refers to the training *Cross-Validation* Folds.

### A.2 Class distribution for length of stay

| Class Label | Class Description (Days) | CV-1   | CV-2   | CV-3   | CV-4   | Test   |
|-------------|--------------------------|--------|--------|--------|--------|--------|
| 0           | <1                       | 131913 | 129634 | 131693 | 133186 | 95439  |
| 1           | 1 - 2                    | 85311  | 83558  | 84065  | 85818  | 61372  |
| 2           | 2 - 3                    | 56353  | 54074  | 54007  | 54780  | 38858  |
| 3           | 3 - 4                    | 39416  | 37605  | 38106  | 38054  | 27142  |
| 4           | 4 - 5                    | 29384  | 27982  | 28760  | 28573  | 20171  |
| 5           | 5 - 6                    | 22830  | 22384  | 22360  | 22626  | 15878  |
| 6           | 6 - 7                    | 18816  | 18612  | 18626  | 18582  | 12940  |
| 7           | 7 - 8                    | 15925  | 15583  | 15697  | 15863  | 10953  |
| 8           | 8 - 14                   | 62655  | 58512  | 59905  | 60611  | 40856  |
| 9           | >14                      | 69800  | 62283  | 60928  | 72238  | 45741  |
| Total       |                          | 532403 | 510227 | 514147 | 530331 | 369350 |

**Table S2.** Class distribution for Length of Stay

### A.3 Algorithm hyperparameters

| Classifier    | Hyperparameters                                                                                                              |
|---------------|------------------------------------------------------------------------------------------------------------------------------|
| Random Forest | num of estimators=300, criterion="gini", max depth=None, min samples split=2, min samples leaf=1                             |
| LSTM          | epochs=30, hidden size=128, batch size=8, num of layers=1, patience=10, dropout rate=0, learning rate=1e-4, weight decay=0.0 |

**Table S3.** Hyperparameters for classifiers

### A.4 Shapley Values

Shapley values come from game theory and are used to estimate the impact of a feature on a system's output. Feature impact is defined as the variation in the output of the model when the feature is observed versus when it is unknown.

Shapley values belong to a category of methods denominated additive. In particular, the additivity is formulated as

$$f(x) = \varphi_0(f, x) + \sum_{i=1}^M \varphi_i(f, x)$$

where  $f(x)$  is the prediction made by the model,  $x$  are the features fed to the model,  $M$  is the number of features,  $\varphi_i$  is the Shapley value of the  $i$ -th feature, and  $\varphi_0 = E[f(x)]$  is the expected value of the model over the training dataset. Also, this assumption ensures the values correctly reflect the difference between the expected model output and the output for a particular prediction.

The Shapley value of a feature is computed via

$$\begin{aligned} \varphi_i(f, x) &= \sum_{S \subseteq S_{all} \setminus \{i\}} \frac{|S|!(M-|S|-1)!}{M!} [f_x(S \cup \{i\}) - f_x(S)] \\ &= \sum_{S \subseteq S_{all} \setminus \{i\}} \frac{1}{\binom{M}{|S|} \binom{M-|S|}{1}} [f_x(S \cup \{i\}) - f_x(S)] \end{aligned} \quad (1)$$

where  $S$  is a subset of all  $M$  input features, and  $f_x(S) = E[f(x)|x_S]$  with  $x_S$  in a subset of the input features with only those belonging to  $S$  present.

In this study we used the SHAP library [13] and its optimisation for tree-based classifiers to compute the Shapley values.

### A.5 Significance tests

| ML Classification Model | Base Model | Secondary Models |         |        |          |
|-------------------------|------------|------------------|---------|--------|----------|
|                         |            | S                | S + NCR | S + CB | S + Ours |
| Random Forest           | S          | -                | 1       | 13.25  | 0        |
|                         | S + NCR    | 99               | -       | 94.82  | 26.13    |
|                         | S + CB     | 86.75            | 5.18    | -      | 1.07     |
|                         | S + Ours   | 100              | 73.87   | 98.93  | -        |
| LSTM                    | S          | -                | 0       | 0      | 0        |
|                         | S + NCR    | 100              | -       | 100    | 0        |
|                         | S + CB     | 100              | 0       | -      | 0        |
|                         | S + Ours   | 100              | 100     | 100    | -        |

(a) In-Hospital Mortality

| ML Classification Model | Base Model | Secondary Models |         |        |          |
|-------------------------|------------|------------------|---------|--------|----------|
|                         |            | S                | S + NCR | S + CB | S + Ours |
| Random Forest           | S          | -                | 81.4    | 69     | 0        |
|                         | S + NCR    | 18.6             | -       | 32.4   | 0        |
|                         | S + CB     | 31               | 67.6    | -      | 0        |
|                         | S + Ours   | 100              | 100     | 100    | -        |
| LSTM                    | S          | -                | 0       | 0      | 0        |
|                         | S + NCR    | 100              | -       | 73     | 0        |
|                         | S + CB     | 100              | 27      | -      | 0        |
|                         | S + Ours   | 100              | 100     | 100    | -        |

(b) Physiological Decompensation

| ML Classification Model | Base Model | Secondary Models |         |        |          |
|-------------------------|------------|------------------|---------|--------|----------|
|                         |            | S                | S + NCR | S + CB | S + Ours |
| Random Forest           | S          | -                | 22.1    | 100    | 0        |
|                         | S + NCR    | 77.9             | -       | 100    | 0        |
|                         | S + CB     | 0                | 0       | -      | 0        |
|                         | S + Ours   | 100              | 100     | 100    | -        |
| LSTM                    | S          | -                | 0       | 0      | 0        |
|                         | S + NCR    | 100              | -       | 100    | 0        |
|                         | S + CB     | 100              | 0       | -      | 0        |
|                         | S + Ours   | 100              | 100     | 100    | -        |

(c) Length of Stay

**Table S4.** Statistical Significance Matrix with Bootstrap Resampling. All the scores are percentages of samples where the base model performs better than the secondary model. Each sample is built by resampling the original test set and then scoring the base/secondary model on it. For example, the last row in (a) shows the base model (LSTM with S + Ours) is better than the secondary models (LSTM with S or S + NCR or S + CB) on 100% samples (i.e. with statistical significance). Here, S refers to Structured, NCR to Neural Concept Recognizer[16], CB to ClinicalBERT, and Ours to our phenotyping model.

## A.6 4-Fold cross validation results

| Classification Model | Features Design | 4-Fold Cross Validation Aggregate |       |              |       |
|----------------------|-----------------|-----------------------------------|-------|--------------|-------|
|                      |                 | AUC-ROC                           |       | AUC-PR       |       |
|                      |                 | Mean                              | SD    | Mean         | SD    |
| SAPS-II              | -               | 0.754                             | 0.006 | 0.322        | 0.031 |
| APACHE-III           | -               | 0.732                             | 0.008 | 0.326        | 0.018 |
| Random Forest        | S               | 0.810                             | 0.008 | 0.418        | 0.018 |
|                      | S + NCR         | 0.819                             | 0.014 | 0.472        | 0.013 |
|                      | S + CB          | 0.804                             | 0.012 | 0.423        | 0.005 |
|                      | S + Ours        | <b>0.834</b>                      | 0.008 | <b>0.477</b> | 0.016 |
| LSTM                 | S               | -                                 | -     | -            | -     |
|                      | S               | 0.829                             | 0.007 | 0.441        | 0.016 |
|                      | S + NCR         | 0.836                             | 0.011 | 0.478        | 0.008 |
|                      | S + CB          | 0.829                             | 0.007 | 0.459        | 0.007 |
|                      | S + Ours        | <b>0.845</b>                      | 0.004 | <b>0.496</b> | 0.014 |

(a) In-hospital mortality

| Classification Model | Features Design | 4-Fold Cross Validation Aggregate |       |              |       |
|----------------------|-----------------|-----------------------------------|-------|--------------|-------|
|                      |                 | AUC-ROC                           |       | AUC-PR       |       |
|                      |                 | Mean                              | SD    | Mean         | SD    |
| Random Forest        | S               | 0.815                             | 0.003 | 0.127        | 0.009 |
|                      | S + NCR         | 0.820                             | 0.003 | 0.125        | 0.007 |
|                      | S + CB          | 0.818                             | 0.004 | 0.123        | 0.008 |
|                      | S + Ours        | <b>0.844</b>                      | 0.004 | <b>0.165</b> | 0.013 |
| LSTM                 | S               | -                                 | -     | -            | -     |
|                      | S               | 0.819                             | 0.003 | 0.136        | 0.016 |
|                      | S + NCR         | 0.820                             | 0.003 | 0.134        | 0.013 |
|                      | S + CB          | 0.821                             | 0.006 | 0.128        | 0.022 |
|                      | S + Ours        | <b>0.833</b>                      | 0.008 | <b>0.144</b> | 0.023 |

(b) Physiological decompensation

| Classification Model | Features Design | 4-Fold Cross Validation Aggregate |       |                |        |
|----------------------|-----------------|-----------------------------------|-------|----------------|--------|
|                      |                 | Kappa                             |       | MAD            |        |
|                      |                 | Mean                              | SD    | Mean           | SD     |
| Random Forest        | S               | 0.381                             | 0.005 | 142.010        | 4.665  |
|                      | S + NCR         | 0.382                             | 0.008 | 148.003        | 4.180  |
|                      | S + CB          | 0.369                             | 0.005 | 149.221        | 3.789  |
|                      | S + Ours        | <b>0.405</b>                      | 0.006 | <b>116.940</b> | 5.674  |
| LSTM                 | S               | -                                 | -     | -              | -      |
|                      | S               | 0.375                             | 0.003 | 134.373        | 17.293 |
|                      | S + NCR         | 0.393                             | 0.013 | 127.165        | 17.484 |
|                      | S + CB          | 0.374                             | 0.015 | 127.678        | 8.608  |
|                      | S + Ours        | <b>0.416</b>                      | 0.012 | <b>116.198</b> | 6.904  |

(c) Length of Stay

**Table S5.** Results for (a) In-Hospital Mortality, (b) Physiological Decompensation, and (c) Length of Stay on the training set. The best score for each classifier is highlighted in bold. Here, S refers to Structured, NCR to Neural Concept Recognizer[16], CB to ClinicalBERT, and Ours to our phenotyping model.

### A.7 Ablation study on phenotype persistency

| Model | Phenotypic propagation | 4-fold Cross Validation Aggregate |       |              |       | Test Set                    |                             |
|-------|------------------------|-----------------------------------|-------|--------------|-------|-----------------------------|-----------------------------|
|       |                        | AUC-ROC                           |       | AUC-PR       |       | AUC-ROC                     | AUC-PR                      |
|       |                        | Mean                              | SD    | Mean         | SD    |                             |                             |
| RF    | without                | 0.807                             | 0.008 | 0.413        | 0.021 | 0.799 (0.772, 0.824)        | 0.351 (0.297, 0.407)        |
|       | with                   | <b>0.834</b>                      | 0.008 | <b>0.477</b> | 0.016 | <b>0.845 (0.826, 0.873)</b> | <b>0.462 (0.404, 0.524)</b> |
| LSTM  | without                | 0.833                             | 0.014 | 0.457        | 0.024 | 0.831 (0.807, 0.853)        | 0.421 (0.361, 0.483)        |
|       | with                   | <b>0.844</b>                      | 0.004 | <b>0.495</b> | 0.013 | <b>0.845 (0.823, 0.868)</b> | <b>0.464 (0.405, 0.523)</b> |

(a) In-hospital Mortality

| Model | Phenotypic propagation | 4-fold Cross Validation Aggregate |       |              |       | Test Set                    |                             |
|-------|------------------------|-----------------------------------|-------|--------------|-------|-----------------------------|-----------------------------|
|       |                        | AUC-ROC                           |       | AUC-PR       |       | AUC-ROC                     | AUC-PR                      |
|       |                        | Mean                              | SD    | Mean         | SD    |                             |                             |
| RF    | without                | 0.812                             | 0.002 | 0.125        | 0.007 | 0.820 (0.815, 0.825)        | 0.127 (0.120, 0.135)        |
|       | with                   | <b>0.844</b>                      | 0.004 | <b>0.165</b> | 0.013 | <b>0.845 (0.840, 0.850)</b> | <b>0.180 (0.171, 0.190)</b> |
| LSTM  | without                | 0.827                             | 0.007 | <b>0.146</b> | 0.017 | <b>0.841 (0.842, 0.851)</b> | <b>0.149 (0.141, 0.156)</b> |
|       | with                   | <b>0.833</b>                      | 0.007 | 0.144        | 0.022 | 0.839 (0.834, 0.844)        | 0.145 (0.138, 0.153)        |

(b) Physiological Decompensation

| Model | Phenotypic propagation | 4-fold Cross Validation Aggregate |       |              |     | Test Set                    |                             |
|-------|------------------------|-----------------------------------|-------|--------------|-----|-----------------------------|-----------------------------|
|       |                        | Kappa                             |       | MAD          |     | Kappa                       | MAD                         |
|       |                        | Mean                              | SD    | Mean         | SD  |                             |                             |
| RF    | without                | 0.376                             | 0.005 | 139.8        | 5.5 | 0.386 (0.380, 0.384)        | 135.0 (134.5, 135.6)        |
|       | with                   | <b>0.405</b>                      | 0.006 | <b>116.9</b> | 5.6 | <b>0.420 (0.418, 0.422)</b> | <b>110.3 (109.3, 111.3)</b> |
| LSTM  | without                | <b>0.427</b>                      | 0.007 | 118.3        | 4.2 | <b>0.441 (0.439, 0.440)</b> | <b>111.4 (110.9, 111.9)</b> |
|       | with                   | 0.416                             | 0.012 | <b>116.2</b> | 6.9 | 0.430 (0.427, 0.432)        | 116.7 (116.2, 117.3)        |

(c) Length of Stay

**Table S6.** Results of ablation study on our phenotyping model to assess the importance of phenotypic modelling. Models without phenotypic propagation encounter high sparsity of phenotypes as data is only available at the timestep the clinical note is written. Models with phenotypic propagation observe phenotypes throughout all timesteps. The best score for each classifier is highlighted in bold.

### A.8 Forecasts per total length of stay

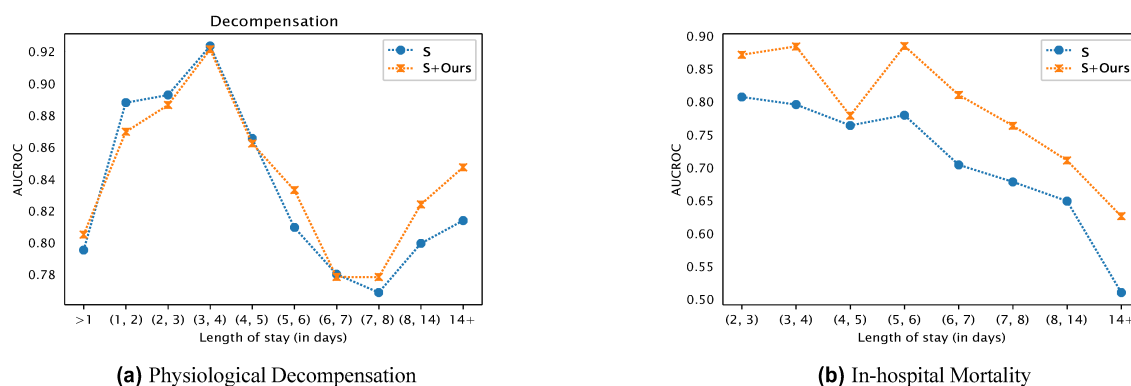

**Figure S1.** AUC-ROC for (a) physiological decompensation and (b) in-hospital mortality for LSTM for patients with different LOS values. While the in-hospital mortality task benefits consistently for any duration of the ICU stay, decompensation sees the best improvements when patients stay the longest. This behaviour is a natural consequence of the fact that while near future forecasts can rely strongly on bedside measurements, forecasting without a fixed endpoint in time is significantly more difficult. Nevertheless, patients who stayed for less than two weeks still saw a benefit when introducing phenotypic features, as they calibrate better the algorithm's prediction. Here, S represents structured features and Ours refers to phenotypes from our phenotyping model.

### A.9 Case study for physiological decompensation

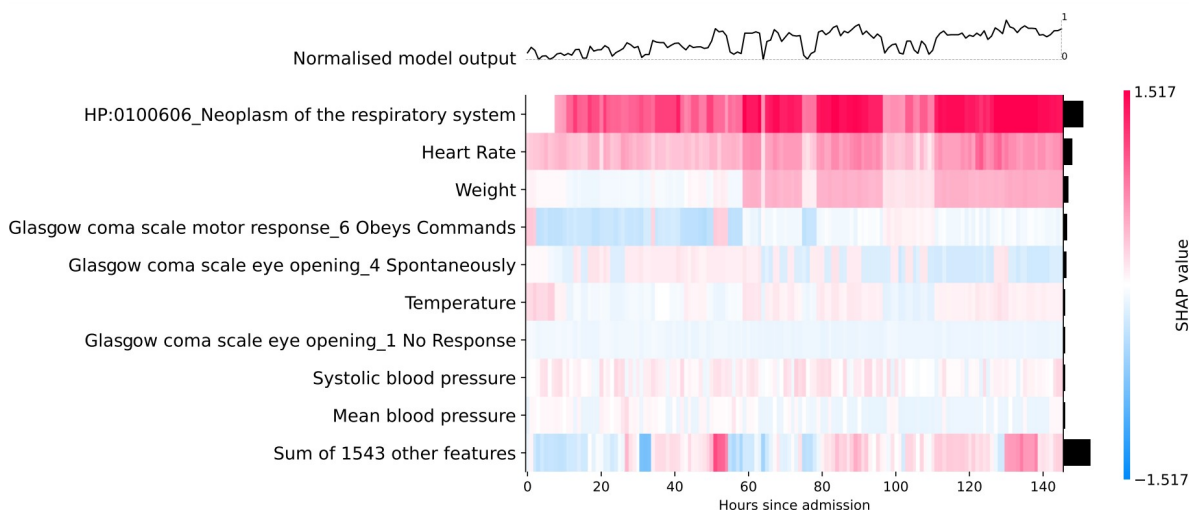

**Figure S2.** Time course of the physiological decompensation prediction for an illustrative patient in the test set. The top plot represents the time series of the prediction in probability (0 for no risk of decompensation, 1 for decompensation). The heatmap illustrates how the contribution of each feature (i.e., each row) varies across time for this subject. Features are sorted in decreasing order according to their importance for this patient, represented by the black horizontal bar at the right of each row. The colour of a row indicates how that feature contributes to the prediction at a moment in time, with red representing a positive contribution (i.e., that the patient will decompensate), and blue for a negative contribution. For this patient, although fluctuations in the prediction come from changes in structured data, taking into account the neoplasm of the respiratory system allows to better estimate the baseline risk of decompensation.

**A.10 Feature importance for Length-of-Stay**

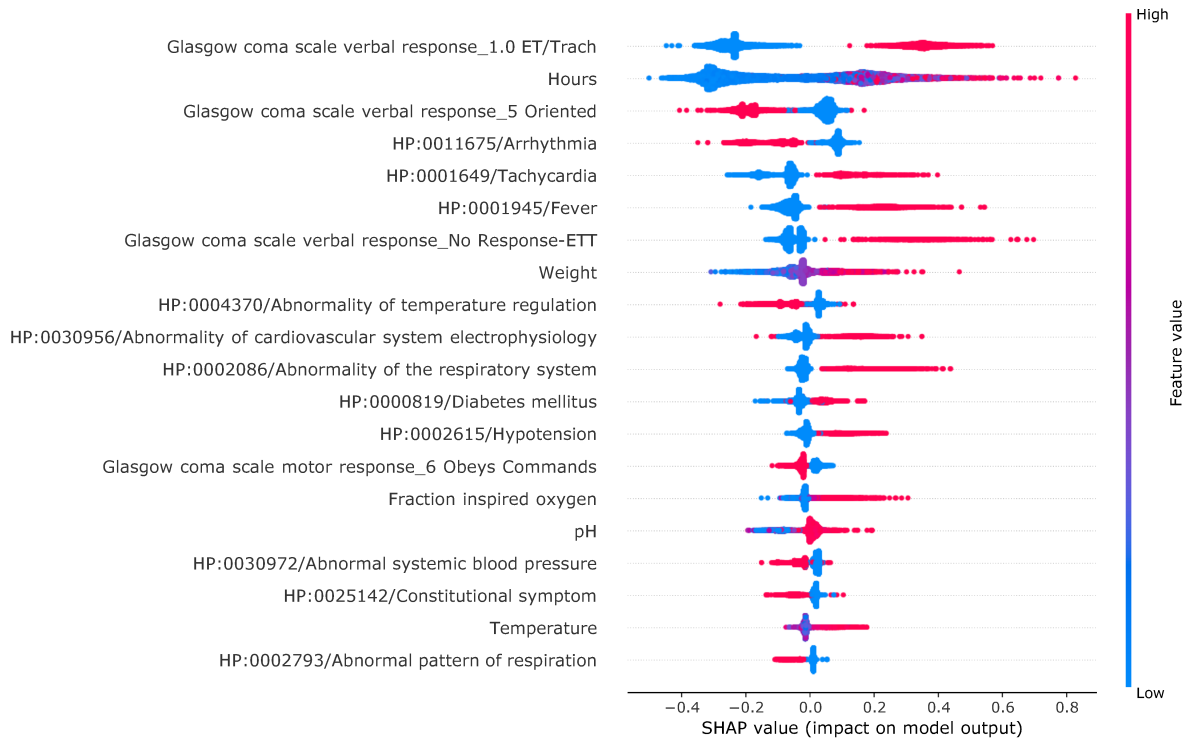

**Figure S3.** Top features for length-of-stay predicting stays of more than 1 week.

**A.11 Calibration curves**

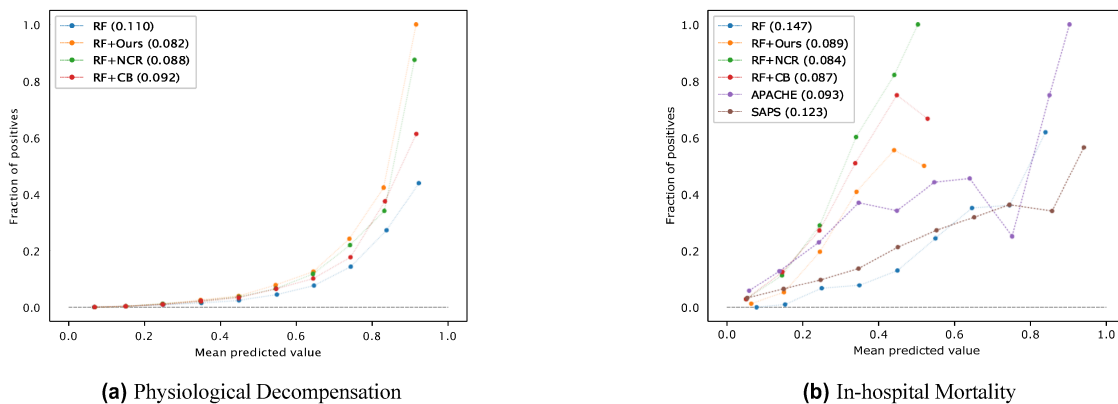

**Figure S4.** Calibration curves with Random Forest for (a) physiological decompensation and (b) in-hospital mortality. RF in legend refers to using structured features only. Ours, NCR, CB: phenotypic features from our phenotyping model, NCR and ClinicalBERT, respectively.



**A.12 Cohort study**

| Cohort                  | No. of Patients | No. of ICU Episodes | AUC-ROC |
|-------------------------|-----------------|---------------------|---------|
| All                     | 2119            | 2453                | 0.845   |
| Cardiovascular Diseases | 681             | 789                 | 0.780   |
| Diabetes                | 563             | 682                 | 0.826   |
| Cancer                  | 277             | 304                 | 0.822   |
| Depression              | 119             | 122                 | 0.783   |

**(a)** In-hospital Mortality.

| Cohort                  | No. of Patients | No. of ICU Episodes | AUC-ROC |
|-------------------------|-----------------|---------------------|---------|
| All                     | 3683            | 4463                | 0.839   |
| Cardiovascular Diseases | 975             | 1197                | 0.792   |
| Diabetes                | 927             | 1191                | 0.808   |
| Cancer                  | 489             | 565                 | 0.806   |
| Depression              | 216             | 240                 | 0.820   |

**(b)** Physiological Decompensation.

| Cohort                  | No. of Patients | No. of ICU Episodes | Kappa |
|-------------------------|-----------------|---------------------|-------|
| All                     | 3698            | 4483                | 0.430 |
| Cardiovascular Diseases | 980             | 1202                | 0.413 |
| Diabetes                | 930             | 1195                | 0.424 |
| Cancer                  | 493             | 572                 | 0.321 |
| Depression              | 216             | 241                 | 0.330 |

**(c)** Length of Stay

**Table S7.** Analysing the generalisability and robustness of our approach on cohorts with different diseases. The accuracies of the best LSTM models which use features from both structured and unstructured data are reported individually on each cohort for each ICU task.
